# Supplementary figures and images for: Intrinsically radiopaque and antimicrobial cellulose based surgical sutures from mechanically powerfulAgave sisalanaplant leaf fibers
Source: Royal Society of Chemistry journal article supplement (doi:10.1039/d1bm01316e), 2021-01-01

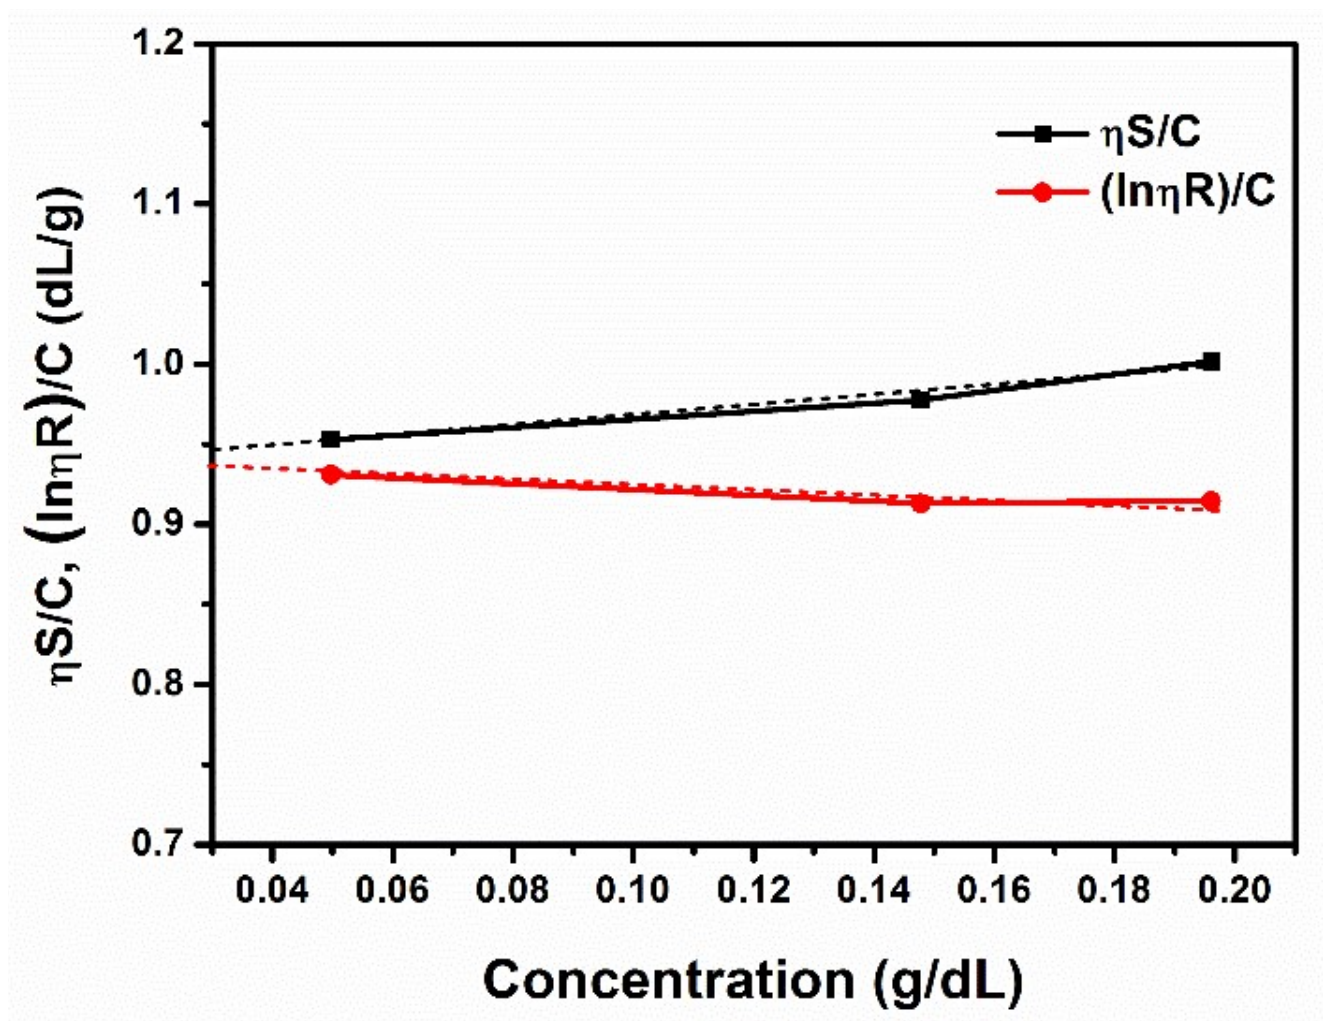

**Figure S1:** Determination of intrinsic viscosity of PLA

Supplement: d1bm01316e1.pdf [file d1bm01316e1.pdf]
